# Supplementary material for: Prognostic Associations of Concomitant Antibiotic Use in Patients with Advanced NSCLC Treated with Atezolizumab: Sensitivity Analysis of a Pooled Investigation of Five Randomised Control Trials
Source: MDPI journal article supplement (doi:10.3390/biomedicines11020528), 2023-02-11
Supplement: s1 [file s1]

**Table S1 Demographics, stratified by whether a patient was classified as being on antibiotics within the 6 week window**

| Summary of patient characteristics by antibiotics, +/- 6 weeks |                            |                         |                          |                |
|----------------------------------------------------------------|----------------------------|-------------------------|--------------------------|----------------|
|                                                                | <b>Total<br/>No. 4,459</b> | <b>No<br/>No. 3,088</b> | <b>Yes<br/>No. 1,371</b> | <b>P-value</b> |
| Study                                                          |                            |                         |                          | 0.49           |
| IMPOWER130                                                     | 724 (16%)                  | 492 (16%)               | 232 (17%)                |                |
| IMPOWER131                                                     | 1,021 (23%)                | 722 (23%)               | 299 (22%)                |                |
| IMPOWER150                                                     | 1,202 (27%)                | 826 (27%)               | 376 (27%)                |                |
| OAK                                                            | 1,225 (27%)                | 840 (27%)               | 385 (28%)                |                |
| POPLAR                                                         | 287 (6%)                   | 208 (7%)                | 79 (6%)                  |                |
| Arm of clinical study (abbreviated)                            |                            |                         |                          | 0.002          |
| ATE                                                            | 757 (17%)                  | 553 (18%)               | 204 (15%)                |                |
| ATEBEVCP                                                       | 400 (9%)                   | 265 (9%)                | 135 (10%)                |                |
| ATECNP                                                         | 827 (19%)                  | 566 (18%)               | 261 (19%)                |                |
| ATECP                                                          | 740 (17%)                  | 494 (16%)               | 246 (18%)                |                |
| BEVCP                                                          | 400 (9%)                   | 292 (9%)                | 108 (8%)                 |                |
| CNP                                                            | 580 (13%)                  | 423 (14%)               | 157 (11%)                |                |
| DOC                                                            | 755 (17%)                  | 495 (16%)               | 260 (19%)                |                |
| ATEFL                                                          | 2,724 (61%)                | 1,878 (61%)             | 846 (62%)                | 0.60           |
| Age (years)                                                    | 64 (57 - 70)               | 63 (57 - 69)            | 65 (58 - 71)             | 0.002          |
| Sex                                                            |                            |                         |                          | 0.25           |
| Male                                                           | 2,896 (65%)                | 2,023 (66%)             | 873 (64%)                |                |
| Female                                                         | 1,563 (35%)                | 1,065 (34%)             | 498 (36%)                |                |
| ECOG PS                                                        |                            |                         |                          | 0.009          |
| 0                                                              | 1,695 (38%)                | 1,213 (39%)             | 482 (35%)                |                |
| 1+                                                             | 2,752 (62%)                | 1,866 (60%)             | 886 (65%)                |                |
| Missing                                                        | 12 (<1%)                   | 9 (<1%)                 | 3 (<1%)                  |                |
| Weight (kg)                                                    |                            |                         |                          | 0.16           |
| Median (IQR)                                                   | 71 (61 - 83)               | 72 (61 - 83)            | 71 (60 - 83)             |                |
| Missing                                                        | 38 (1%)                    | 38 (1%)                 | 0 (0%)                   |                |
| Liver tumor site at baseline                                   | 748 (17%)                  | 509 (16%)               | 239 (17%)                | 0.46           |
| Smoking history                                                |                            |                         |                          | < 0.001        |
| Never                                                          | 669 (15%)                  | 473 (15%)               | 196 (14%)                |                |
| Previous                                                       | 2,815 (63%)                | 1,880 (61%)             | 935 (68%)                |                |
| Current                                                        | 974 (22%)                  | 734 (24%)               | 240 (18%)                |                |
| Missing                                                        | 1 (<1%)                    | 1 (<1%)                 | 0 (0%)                   |                |
| Histology                                                      |                            |                         |                          | 0.87           |
| Non-squamous                                                   | 3,021 (68%)                | 2,095 (68%)             | 926 (68%)                |                |
| Squamous                                                       | 1,438 (32%)                | 993 (32%)               | 445 (32%)                |                |
| PDL1_Grouping                                                  |                            |                         |                          | 0.082          |
| Negative                                                       | 3,026 (68%)                | 2,121 (69%)             | 905 (66%)                |                |
| Positive                                                       | 1,423 (32%)                | 960 (31%)               | 463 (34%)                |                |
| Missing                                                        | 10 (<1%)                   | 7 (<1%)                 | 3 (<1%)                  |                |
| PPI - Prior concomitant or up to 42 days                       | 1,352 (30%)                | 805 (26%)               | 547 (40%)                | < 0.001        |
| Corticosteroids - PRE or POST 42 days                          | 1,933 (43%)                | 1,193 (39%)             | 740 (54%)                | < 0.001        |

---

Summary of patient characteristics by antibiotics, +/- 6 weeks

---

|  | <b>Total</b>     | <b>No</b>        | <b>Yes</b>       |                |
|--|------------------|------------------|------------------|----------------|
|  | <b>No. 4,459</b> | <b>No. 3,088</b> | <b>No. 1,371</b> | <b>P-value</b> |

---

Data are median (IQR) or number of patients (%). P values per Chi-Square test for categorical data and Kruskal-Wallis test for continuous data.

**Table S2 Breakdown of antibiotic class across the total number of antibiotic prescriptions within the 6 week window**

| Summary of patient characteristics |                            |
|------------------------------------|----------------------------|
|                                    | <b>Total<br/>No. 2,793</b> |
| Medication class                   |                            |
| QUINOLONE ANTIBIOTICS              | 768 (27%)                  |
| PENICILLINS                        | 688 (25%)                  |
| CEPHALOSPORIN ANTIBIOTICS          | 411 (15%)                  |
| MACROLIDE ANTIBIOTICS              | 160 (6%)                   |
| GLYCOPEPTIDE ANTIBIOTICS           | 145 (5%)                   |
| MISCELLANEOUS ANTIMICROBIALS       | 141 (5%)                   |
| CARBAPENEM ANTIBIOTICS             | 106 (4%)                   |
| TETRACYCLINES                      | 68 (2%)                    |
| AMINOGLYCOSIDE ANTIMICROBIALS      | 64 (2%)                    |
| [13 other]                         | 242 (9%)                   |

Data are median (IQR) or number of patients (%).

**Table S3 Antibiotic use, stratified by whether the patient was classified as having antibiotics before or after treatment**

| Summary of patient characteristics                            |                            |
|---------------------------------------------------------------|----------------------------|
|                                                               | <b>Total<br/>No. 1,371</b> |
| Antibiotics - Concomitant or 42 days PRE treatment initiation | 288 (21%)                  |
| Antibiotics - 42 days POST                                    | 1,195 (87%)                |

Data are median (IQR) or number of patients (%).

## Antibiotic use by Study Arm, PFS

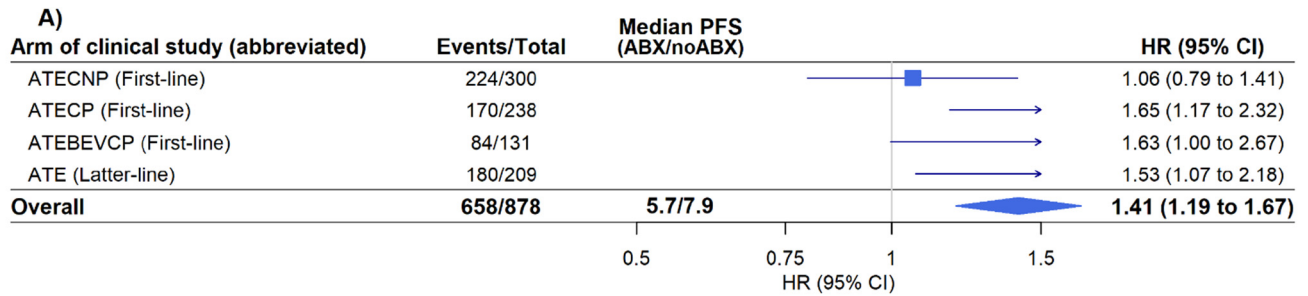

## Antibiotic use by Study Arm, OS

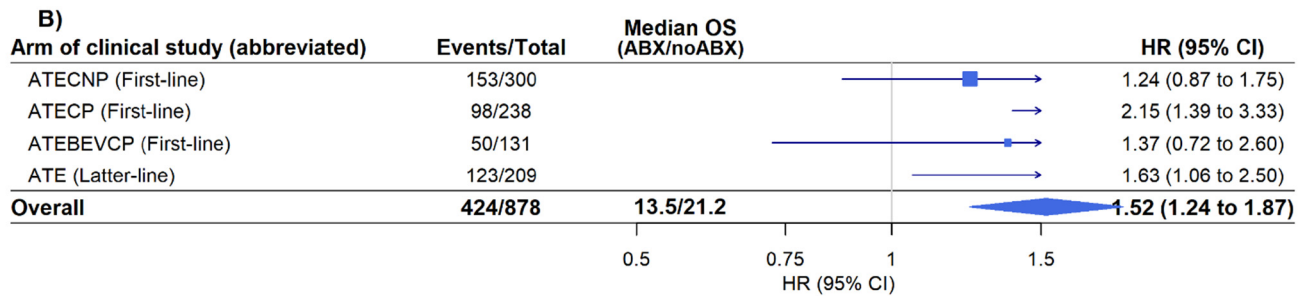

## Antibiotic use by Study Arm, ORR

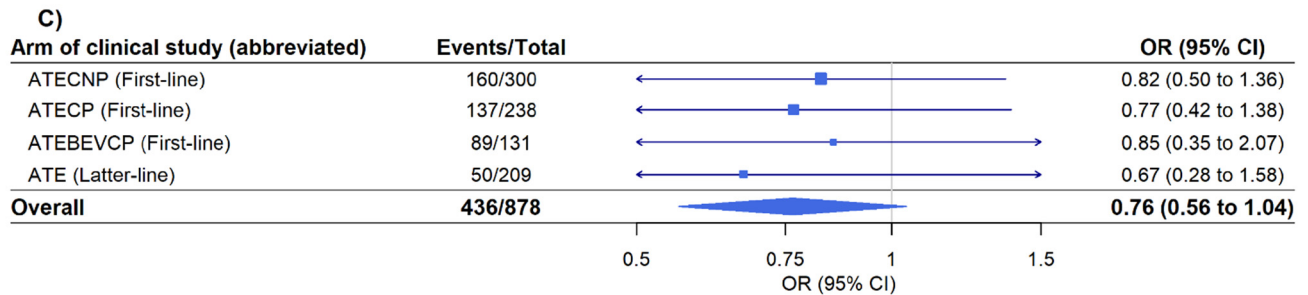

**Figure S1:** ATECNP (atezolizumab with carboplatin and nab-paclitaxel), ATECP (atezolizumab with carboplatin and paclitaxel), ATEBEVCP (atezolizumab with bevacizumab, carboplatin and paclitaxel), ATE (atezolizumab monotherapy).

Forest plot of the adjusted association between antibiotic use and prognosis by study arm in the **PDL-1 positive** cohort randomised therapies **with** atezolizumab. Median time to progression-free survival (PFS) and overall survival (OS) are unadjusted.

A) Forest plot of association of antibiotics with PFS.

B) Forest plot of association of antibiotics with OS.

C) Forest plot of association of antibiotics with objective response rate (ORR).

## Antibiotic use by Study Arm, PFS

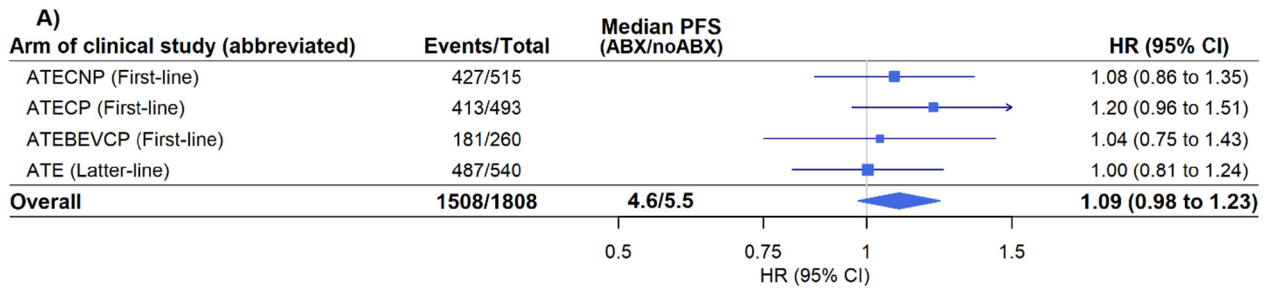

## Antibiotic use by Study Arm, OS

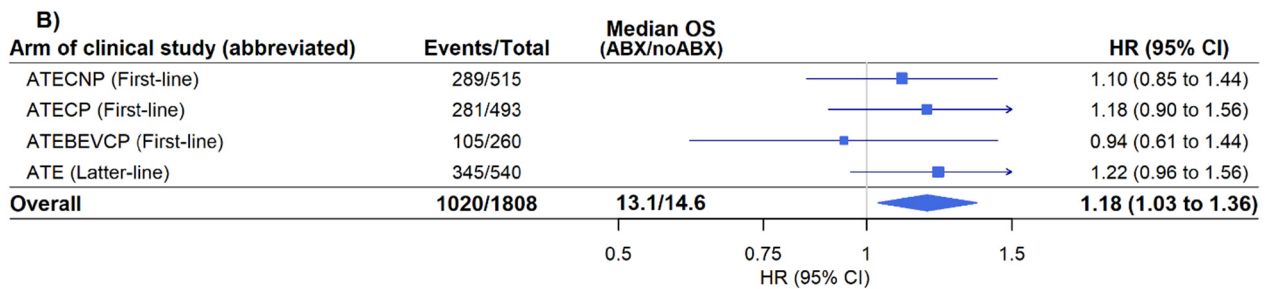

## Antibiotic use by Study Arm, ORR

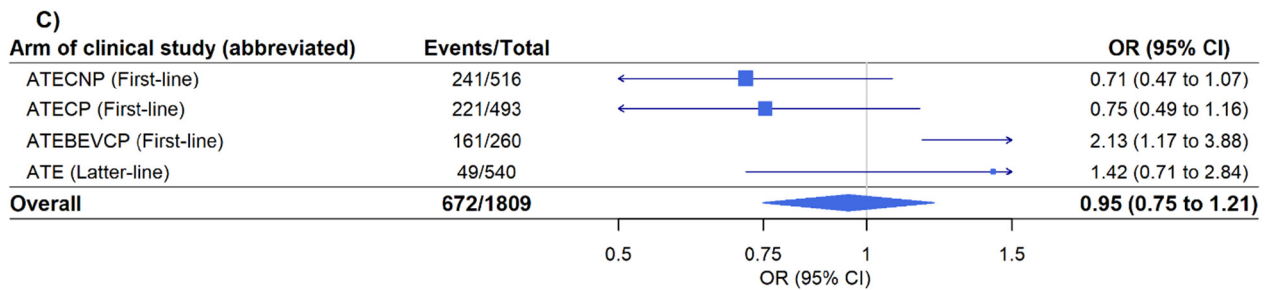

**Figure S2:** ATECNP (atezolizumab with carboplatin and nab-paclitaxel), ATECP (atezolizumab with carboplatin and paclitaxel), ATEBEVCP (atezolizumab with bevacizumab, carboplatin and paclitaxel), ATE (atezolizumab monotherapy).

Forest plot of the adjusted association between antibiotic use and prognosis by study arm in the **PDL-1 negative** cohort randomised therapies **with** atezolizumab. Median time to progression-free survival (PFS) and overall survival (OS) are unadjusted.

A) Forest plot of association of antibiotics with PFS.

B) Forest plot of association of antibiotics with OS.

C) Forest plot of association of antibiotics with objective response rate (ORR).

## Antibiotic use by Study Arm, PFS

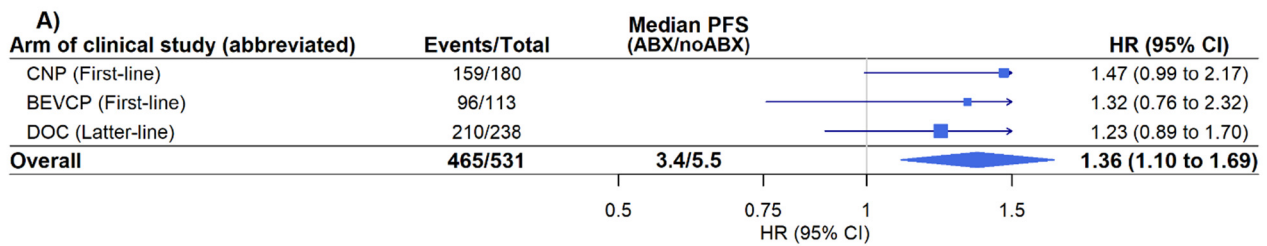

## Antibiotic use by Study Arm, OS

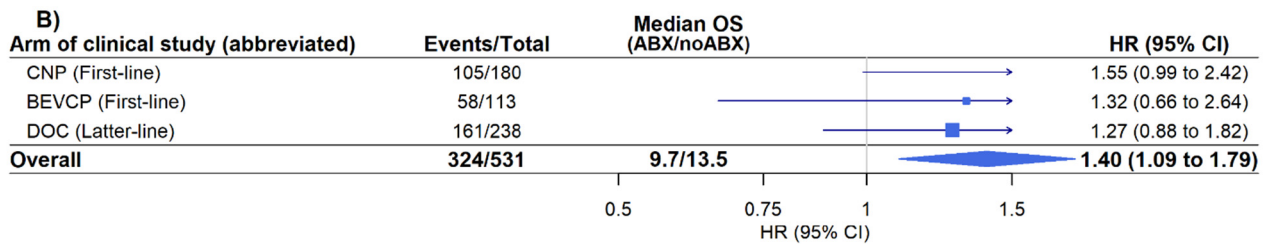

## Antibiotic use by Study Arm, ORR

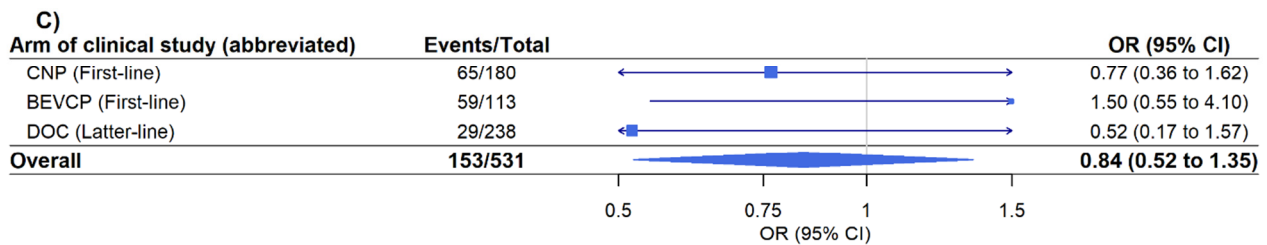

**Figure S3:** Forest plot of the adjusted association between antibiotic use and prognosis by study arm in the **PDL-1 positive** cohort randomised therapies **without** atezolizumab. Median time to progression-free survival (PFS) and overall survival (OS) are unadjusted.

A) Forest plot of association of antibiotics with PFS.

B) Forest plot of association of antibiotics with OS.

C) Forest plot of association of antibiotics with objective response rate (ORR).

Antibiotic use by Study Arm, PFS

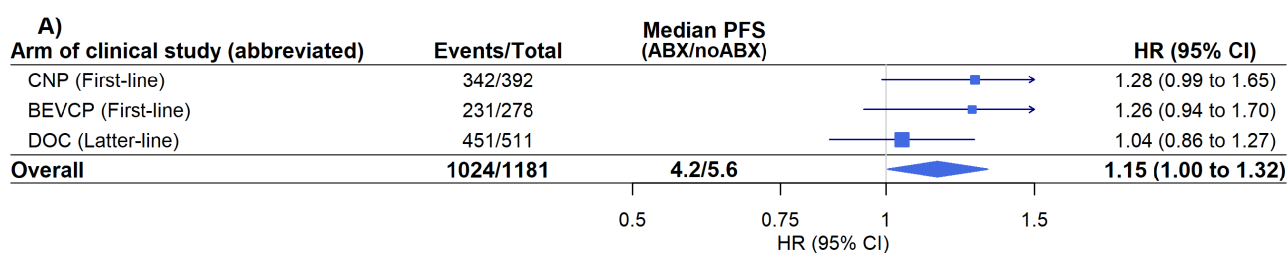

Antibiotic use by Study Arm, OS

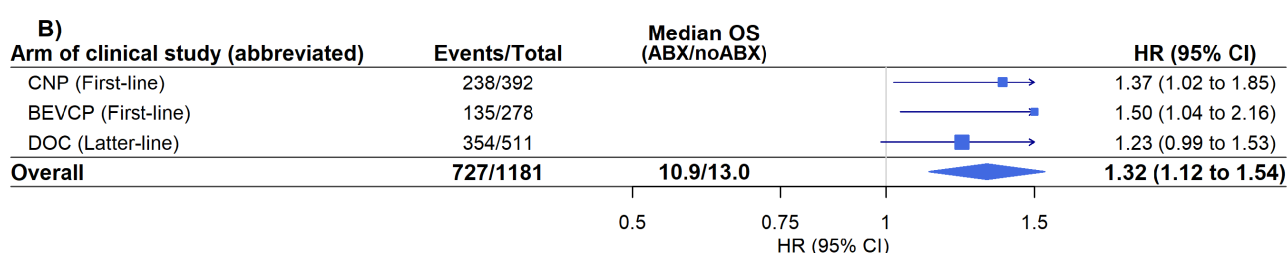

Antibiotic use by Study Arm, ORR

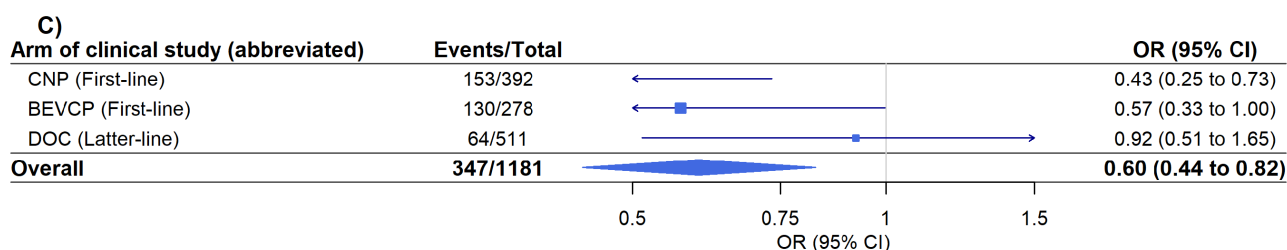

**Figure S4:** Forest plot of the adjusted association between antibiotic use and prognosis by study arm in the **PDL-1 negative** cohort randomised therapies **without** atezolizumab. Median time to progression-free survival (PFS) and overall survival (OS) are unadjusted.

A) Forest plot of association of antibiotics with PFS.

B) Forest plot of association of antibiotics with OS.

C) Forest plot of association of antibiotics with objective response rate (ORR)
